# Supplementary material for: Cannabidiol Isolated From Cannabis sativa L. Protects Intestinal Barrier From In Vitro Inflammation and Oxidative Stress
Source: PubMed Central journal article supplement (PMC8115937; doi:10.3389/fphar.2021.641210), 2021-04-28
Supplement: image1.pdf [file image1.pdf]

## *Supplementary Material*

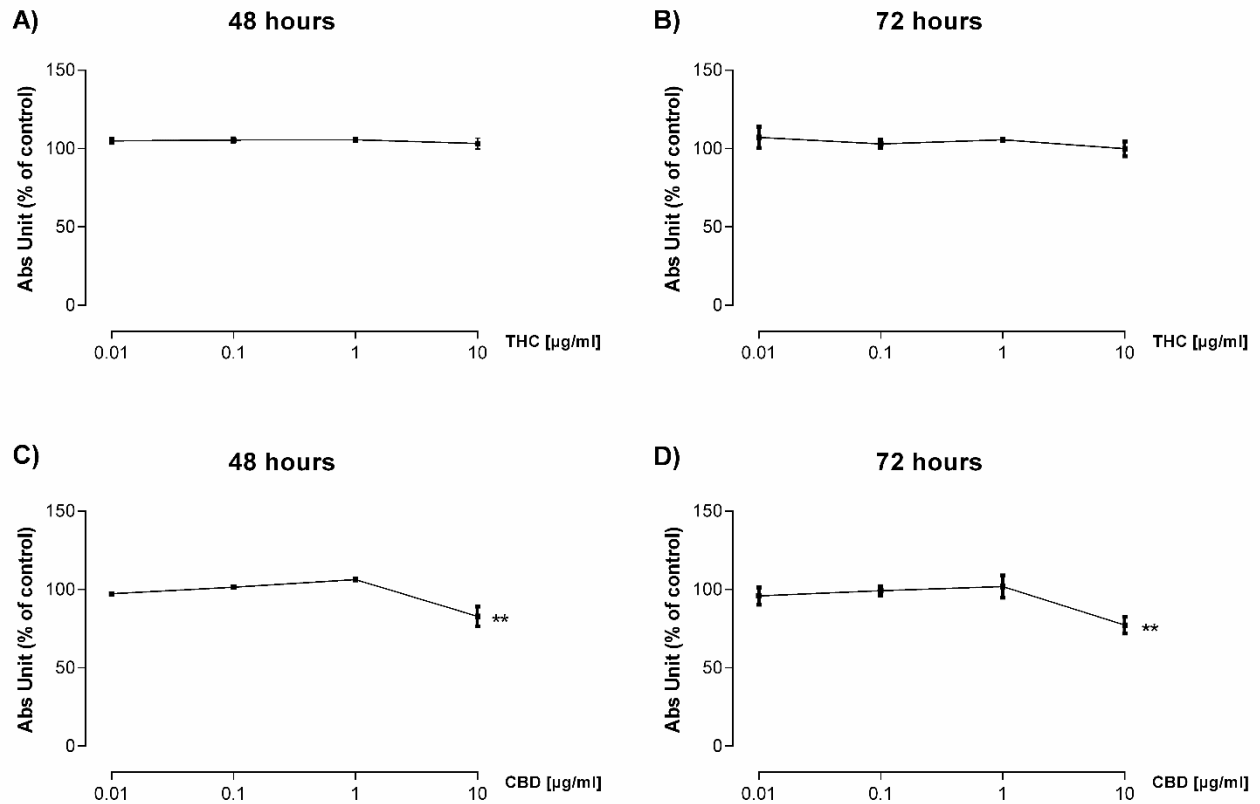

**Supplementary Figure 1.** Effect of 48-72 h of treatment with THC (A-B) and CBD (C-D) (0.01-0.1-1-10 µg/mL), on Caco-2 cell viability. Results are the mean  $\pm$  SEM of  $n = 3$  experiments and are expressed as percentage of absorbance of treated cells related to control. \*\* $p < 0.01$  treatment vs control, Standard ANOVA procedures.
